# Supplementary material
Source: publisher figshare collection journal article supplement (https://acs.figshare.com/ndownloader/files/3595638)
Supplement: Supplementary file 1 [file 3595638]

# Supporting information for

## Au@Ag Nanoparticles: Halides Stabilize {100} Facets

Sergio Gómez-Graña,<sup>a</sup> Bart Goris,<sup>b</sup> Thomas Altantzis,<sup>b</sup> Cristina Fernández-López,<sup>a</sup> Enrique Carbó-Argibay,<sup>a</sup> Andres Guerrero-Martínez,<sup>a,c</sup> Neyvis Almora-Barrios,<sup>d</sup> Nuria López,<sup>d</sup> Isabel Pastoriza-Santos,<sup>a</sup> Jorge Pérez-Juste,<sup>a</sup> Sara Bals,<sup>b</sup> Gustaaf Van Tendeloo,<sup>b</sup> and Luis M. Liz-Marzán<sup>a,e,f</sup>

<sup>a</sup> *Departamento de Química Física, Universidade de Vigo, 36310 Vigo, Spain.*

<sup>b</sup> *EMAT-University of Antwerp, Groenenborgerlaan 171, B-2020 Antwerp, Belgium.*

<sup>c</sup> *Department of Physical Chemistry I, Complutense University of Madrid Avda. Complutense s/n, 28040 Madrid, Spain*

<sup>d</sup> *Institute of Chemical Research of Catalonia, ICIQ, Av. Països Catalans, 16, 43007 Tarragona, Spain*

<sup>e</sup> *BioNanoPlasmonics Laboratory, CIC biomaGUNE, Paseo de Miramón 182, 20009 Donostia - San Sebastián, Spain*

<sup>f</sup> *Ikerbasque, Basque Foundation for Science, 48011 Bilbao, Spain*

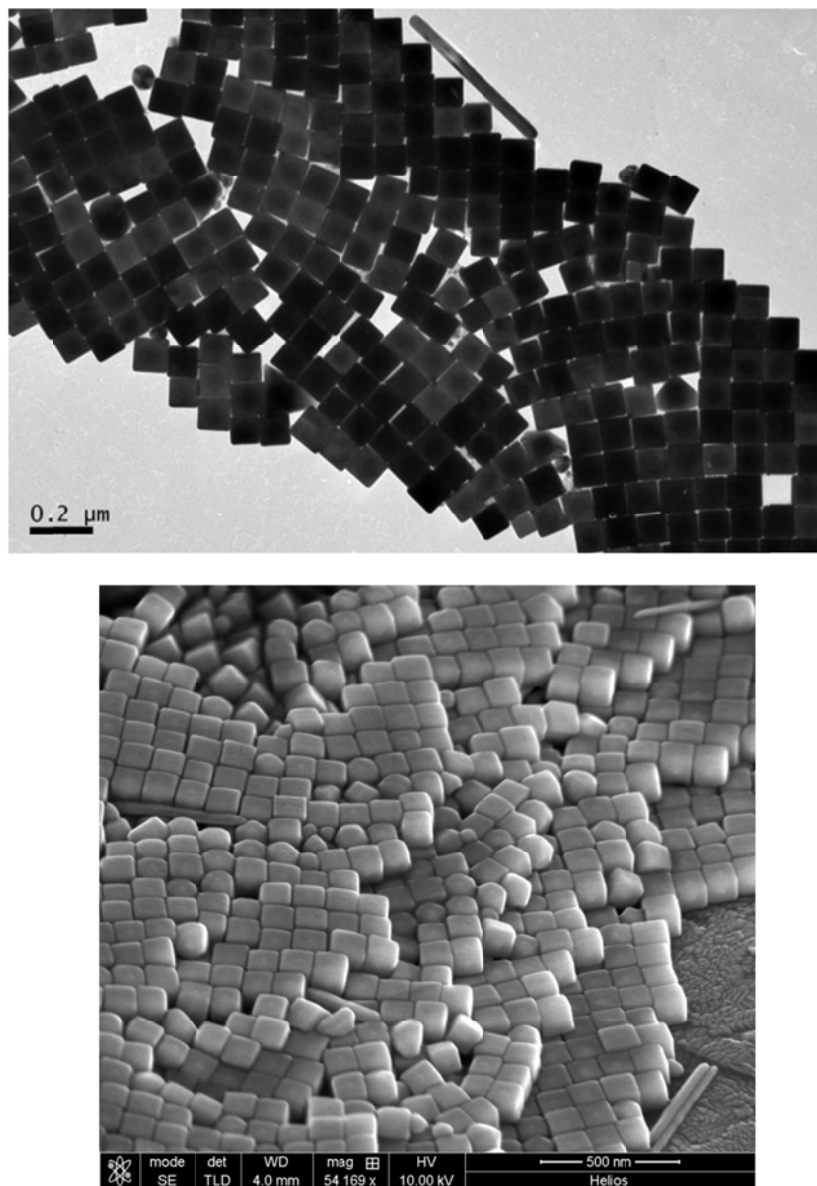

**Figure S1.** Representative TEM (upper row) and SEM (lower row) images of the Au@Ag cubes.

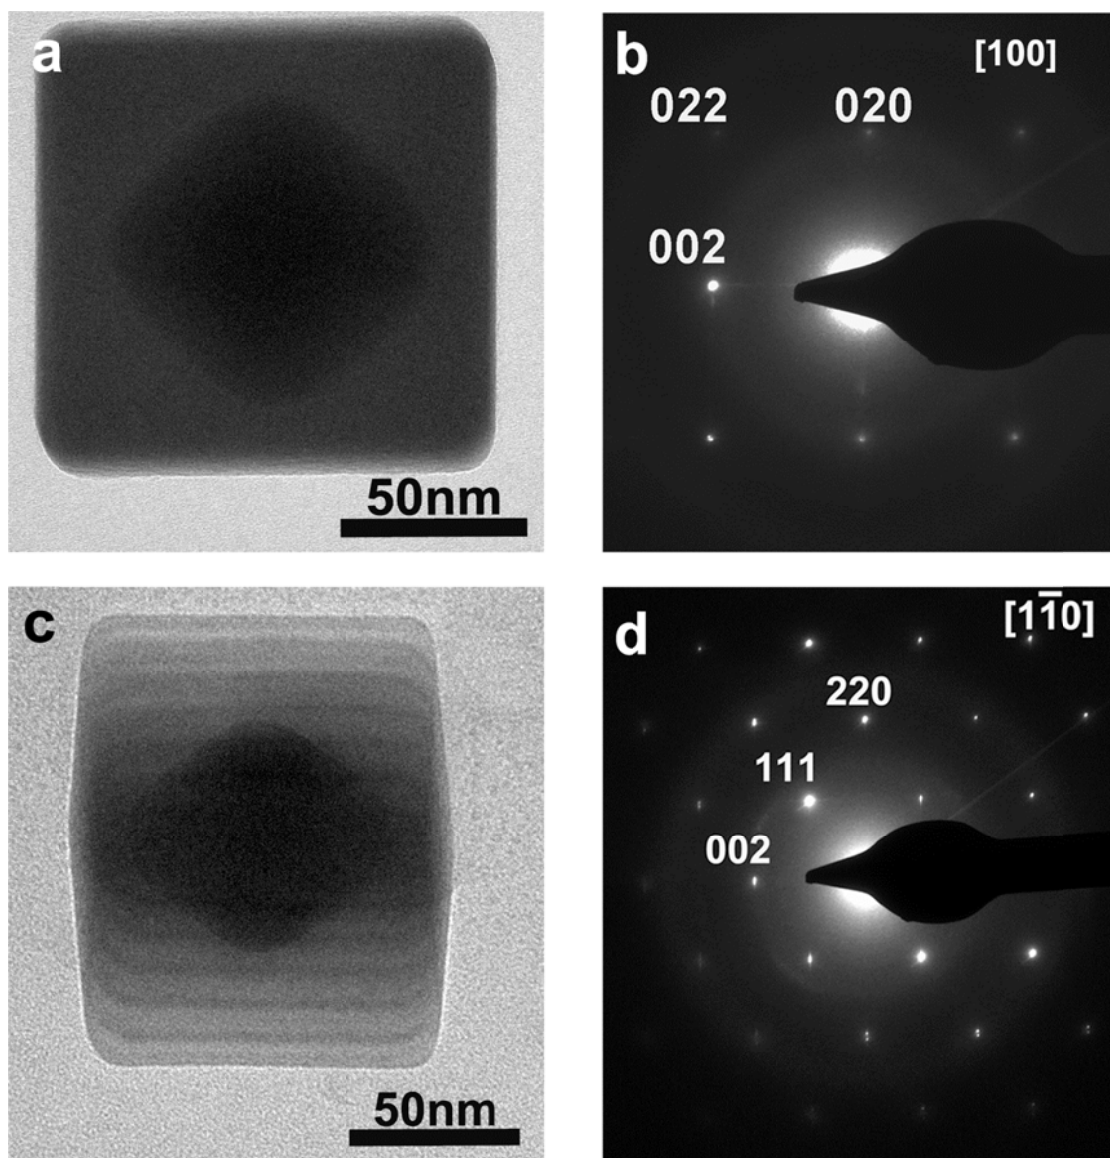

**Figure S2.** (a) TEM image of the same particle lying on an edge parallel to the [001] direction and (c) after being rotated 45° along the [001]. Therefore the observed parallel fringes of equal-thickness observed in the top and bottom sides of the cube are a consequence of that orientation. (b and d) acquired selected area diffraction patterns of the projections in figures a and c respectively.

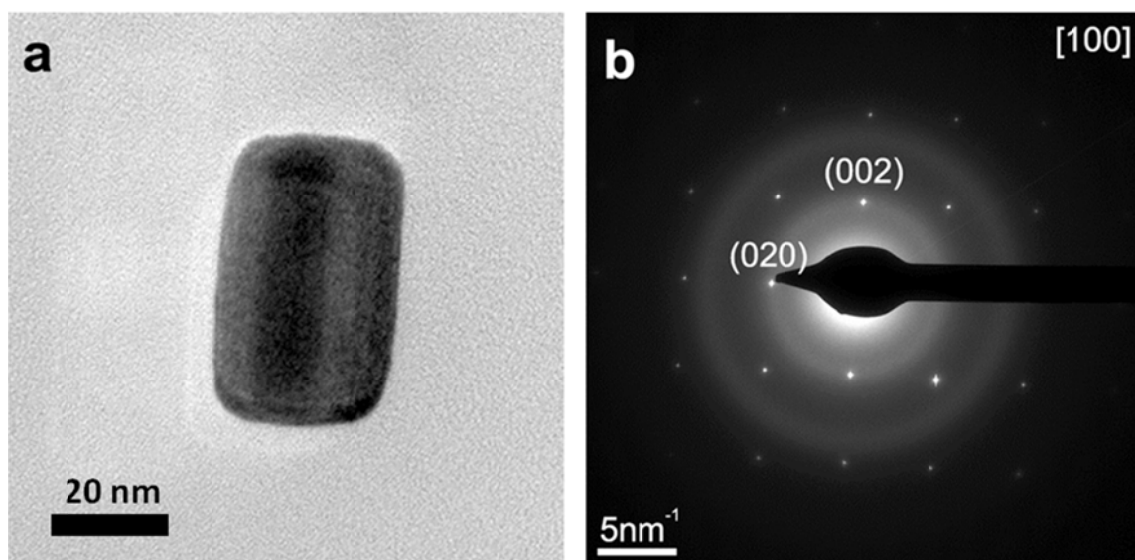

**Figure S3.** (a) TEM projection and (b) acquired selected area diffraction pattern of an Au@AgNR on a carbon support. The diffraction pattern indicates that the nanorod is viewed along a [100] zone axis. The absence of splitting indicates the epitaxial growth of Ag on the Au rod.

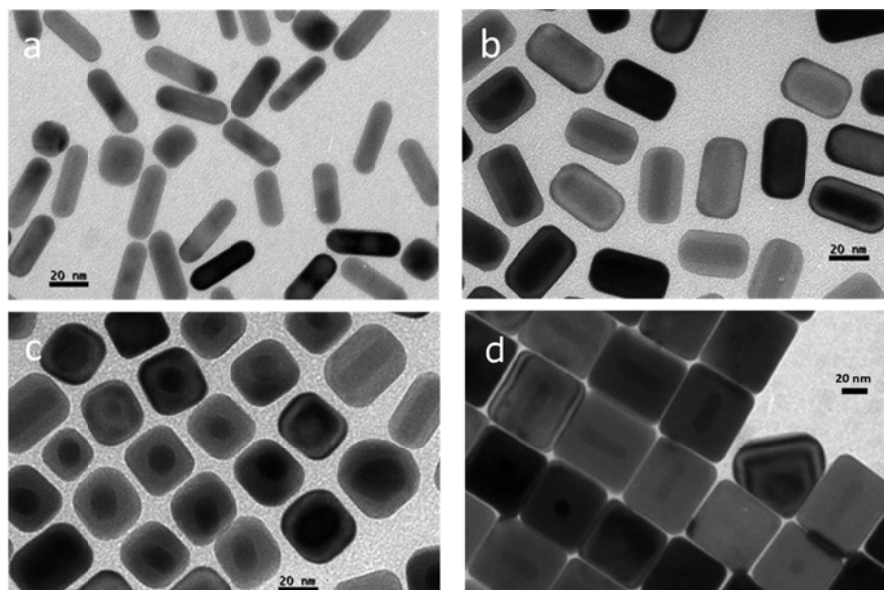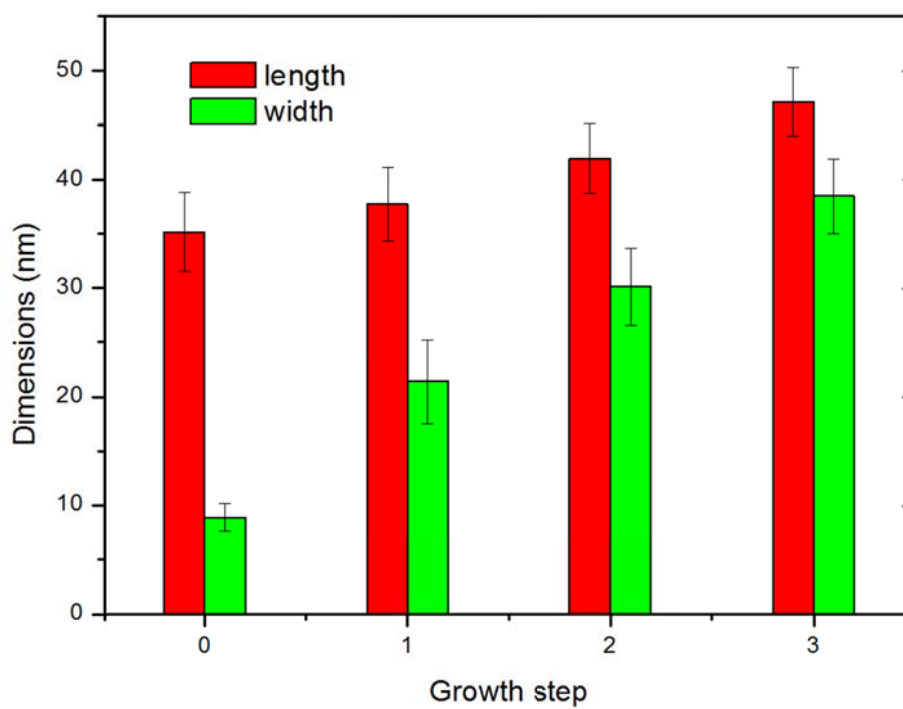

**Figure S4.** Representative TEM images of the initial AuNRs (a) and after one (b), two (c) and three (d) growth steps. Average dimensions of the initial AuNRs and after each growth step.

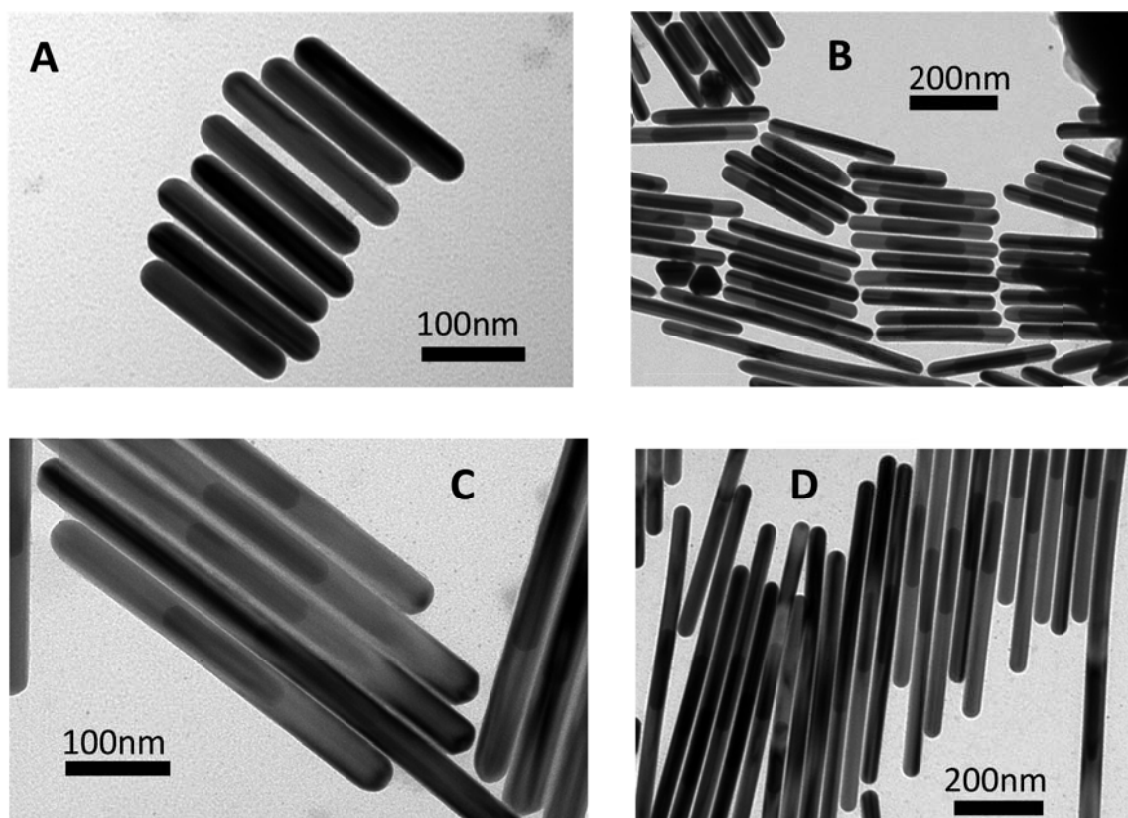

**Figure S5.** Representative TEM images of the initial pentatwinned AuNRs (A) and after three different growth steps. It can be observed that the average length of the Au@AgNR increases from B to D while the width remains almost constant.

**Table S1.** Surface energies,  $\gamma$  in J/m<sup>2</sup>, for the lowest-index surfaces of relevant structures. The surface energy was calculated as follows:

$$\gamma_X = \frac{(E_{non-relaxed\ slab} - N E_{bulk})}{2A} + \frac{(E_{relaxed\ slab} - E_{non-relaxed\ slab})}{A}$$

where X represents the surface and A its corresponding area;  $E_{non-relaxed-slab}$  is the energy for the as cut slab  $E_{relaxed-slab}$  is the slab energy upon relaxation.

|            | (111) | (100) | (110) |
|------------|-------|-------|-------|
| Au         | 0.736 | 0.882 | 0.917 |
| Au@Ag(2ML) | 0.939 | 0.946 | 0.948 |

**Table S2.** Adsorption energies,  $E_{ads}$  in eV, and their contribution to the surface energy  $\gamma' = \gamma + \Delta E/A$  in J/m<sup>2</sup>, for the lowest-index surfaces of relevant structures. Adsorption energies were calculated with respect to gas-phase  $X_2$  or the crystal halide AgX. For AgX,  $E_{ads} = \Delta E$ . Instead, for the halide,  $X^-$ ,  $\Delta E = E_{solv} + EA - \phi + E_{ads}$ , as it includes the solvation energy of the halide,  $E_{solv}$ , its electron affinity,  $EA$ , the work function of the metal,  $\phi$ , and the adsorption energy of the neutral halogen atom X.

|      | $E_{ads}(111)$ | $\gamma' (111)$ | $E_{ads}(100)$ | $\gamma'(100)$ | $E_{ads}(110)$ | $\gamma'(110)$ |
|------|----------------|-----------------|----------------|----------------|----------------|----------------|
| Cl   | -1.01          | 1.074           | -1.66          | 0.462          | -1.56          | 0.668          |
| Br   | -0.82          | 0.864           | -1.57          | 0.204          | -1.56          | 0.426          |
| AgCl | --             | 0.939           | -0.61          | 0.603          | -0.86          | 0.635          |
| AgBr | --             | 0.939           | -0.90          | 0.468          | -0.95          | 0.479          |
